# Supplementary material for: The Optimal Strategy of Vitamin D for Sarcopenia: A Network Meta-Analysis of Randomized Controlled Trials
Source: MDPI journal article supplement (doi:10.3390/nu13103589), 2021-10-14

# Nutrients

## The optimal strategy of vitamin D for sarcopenia: A network meta-analysis of randomized controlled trials

(Supplementary File)

### Authors:

Shih-Hao Cheng, M.D.<sup>1,2,4</sup>, Kee-Hsin Chen, R.N., Ph.D.<sup>4,5,6,7</sup>,  
Chiehfeng Chen, Prof., M.D., Ph.D.<sup>5,8,9,10</sup>, Woei-Chyn Chu, Prof.,  
Ph.D.<sup>1</sup>, Yi-No Kang, consultant, M.A.<sup>5,8,11,12</sup>

### Affiliations:

1. Department of Biomedical Engineering, National Yang Ming Chiao Tung University, Taipei, Taiwan
2. Department of Orthopedics, Cheng Hsin General hospital, Taipei, Taiwan
3. Department of Orthopedics, Wan Fang Hospital, Medical University Hospital, Taipei, Taiwan
4. Post-Baccalaureate Program in Nursing, College of Nursing, Taipei Medical University, Taipei, Taiwan
5. Cochrane Taiwan, Taipei Medical University, Taipei, Taiwan
6. Center for Nursing and Healthcare Research in Clinical Practice Application, Wan Fang Hospital, Taipei Medical University, Taipei, Taiwan.
7. Evidence-based Knowledge Translation Center, Wan Fang Hospital, Taipei Medical University, Taipei, Taiwan.
8. Evidence-Based Medicine Center, Wan Fang Hospital, Medical University Hospital, Taipei, Taiwan
9. Division of Plastic Surgery, Department of Surgery, Wan Fang Hospital, Taipei Medical University, Taipei, Taiwan
10. Department of Public Health, School of Medicine, College of Medicine, Taipei Medical University, Taipei, Taiwan
11. Research Center of Big Data and Meta-analysis, Wan Fang Hospital, Taipei Medical University, Taipei, Taiwan
12. Institute of Health Policy & Management, College of Public Health, National Taiwan University, Taiwan

# Supplementary

**Supplementary Text 1.** Search strategy

**Supplementary Table S1.** Risk of bias

**Supplementary Text 2.** Inconsistency test of changes in hand grip

**Supplementary Figure S1.** Network plot of gait speed

**Supplementary Figure S2.** Network forest plot of muscle mass

**Supplementary Figure S3.** Funnel plot of relative skeletal muscle index

**Supplementary Figure S4.** Funnel plot of body fat mass

# Supplementary Text 1

## Search strategy (Primary search strategy)

### Primary search strategy

- #1. sarcopenia
- #2. sarcopenic
- #3. #1 OR #2
- #4. vitamin D
- #5. vitamin D3
- #6. ergocalciferol derivative
- #7. dihydrotachysterol
- #8. 25 hydroxyvitamin D
- #9. colecalciferol derivative
- #10. #4 OR #5 OR #6 OR #7 OR #8 OR #9
- #11. #3 AND #10

### Search details in Cochrane Database and Cochrane CENTRAL

(sarcopenia OR sarcopenic) in All Text AND (vitamin D OR vitamin D3 OR ergocalciferol derivative OR dihydrotachysterol OR 25 hydroxyvitamin D OR colecalciferol derivative) in All Text - (Word variations have been searched)

### Search details in Embase

('sarcopenia'/exp OR sarcopenia OR 'sarcopenia' OR sarcopenic:ti,ab) AND ('vitamin d'/exp OR 'vitamin d' OR '24,25 dihydroxyvitamin d'/exp OR '24,25 dihydroxyvitamin d' OR '25 hydroxyvitamin d'/exp OR '25 hydroxyvitamin d' OR 'vitamin d, 25 hydroxy' OR 'colecalciferol derivative'/exp OR 'cholecalciferol derivative' OR 'colecalciferol derivative' OR 'vitamin d3 derivative' OR 'dihydrotachysterol'/exp OR '10, 19 dihydroercalcinol' OR '9, 10 seco 5, 7, 22 ergostatrien 3beta ol' OR '9, 10 secoergosta 5, 7, 22 trien 3beta ol' OR 'a.t.10' OR 'antitanil' OR 'antitetanin' OR 'antitetanine' OR 'at 10' OR 'at-10' OR 'at10' OR 'atecen' OR 'calcamin' OR 'calcamine' OR 'calcinosefaktor' OR 'dht intensol' OR 'dichistrolum' OR 'dichysterol' OR 'dichystrol' OR 'dihydral' OR 'dihydrotachysterin' OR 'dihydrotachysterine' OR 'dihydrotachysterol' OR 'dihydrotachysterol 2' OR 'dihydrotachysterol 3' OR 'dikystrol' OR 'dygratyl' OR 'hytakerol' OR 'manipal' OR 'parterol' OR 'tachidon' OR 'tachysterol, dihydro' OR 'tachystin' OR 'tachystine' OR 'tachystol' OR 'tetilan' OR 'ergocalciferol derivative'/exp OR 'calciferol derivative' OR 'ergocalciferol derivative' OR 'vitamin d2 derivative' OR 'vitamin d3')

# Supplementary Text 1

## Search strategy (Primary search strategy)

### Search details in PubMed

("sarcopenia"[MeSH Terms] OR "sarcopenia"[All Fields] OR "sarcopenic"[All Fields]) AND ("vitamin d"[MeSH Terms] OR "vitamin d"[All Fields] OR "ergocalciferols"[MeSH Terms] OR "ergocalciferols"[All Fields] OR ("cholecalciferol"[MeSH Terms] OR "cholecalciferol"[All Fields] OR ("vitamin"[All Fields] AND "d3"[All Fields]) OR "vitamin d3"[All Fields]) OR (("ergocalciferols"[MeSH Terms] OR "ergocalciferols"[All Fields] OR "ergocalciferol"[All Fields]) AND ("analogs and derivatives"[MeSH Subheading] OR ("analogs"[All Fields] AND "derivatives"[All Fields]) OR "analogs and derivatives"[All Fields] OR "derivatives"[All Fields] OR "derivable"[All Fields] OR "derivant"[All Fields] OR "derivants"[All Fields] OR "derivate"[All Fields] OR "derivated"[All Fields] OR "derivates"[All Fields] OR "derivation"[All Fields] OR "derivations"[All Fields] OR "derivative"[All Fields] OR "derive"[All Fields] OR "derived"[All Fields] OR "derives"[All Fields] OR "deriving"[All Fields])) OR ("dihydrotachysterol"[MeSH Terms] OR "dihydrotachysterol"[All Fields]) OR ("25 hydroxyvitamin d"[Supplementary Concept] OR "25 hydroxyvitamin d"[All Fields] OR "25 hydroxyvitamin d"[All Fields] OR "calcifediol"[MeSH Terms] OR "calcifediol"[All Fields]) OR (("cholecalciferol"[MeSH Terms] OR "cholecalciferol"[All Fields] OR "cholecalciferols"[All Fields] OR "colecalfiferol"[All Fields]) AND ("analogs and derivatives"[MeSH Subheading] OR ("analogs"[All Fields] AND "derivatives"[All Fields]) OR "analogs and derivatives"[All Fields] OR "derivatives"[All Fields] OR "derivable"[All Fields] OR "derivant"[All Fields] OR "derivants"[All Fields] OR "derivate"[All Fields] OR "derivated"[All Fields] OR "derivates"[All Fields] OR "derivation"[All Fields] OR "derivations"[All Fields] OR "derivative"[All Fields] OR "derive"[All Fields] OR "derived"[All Fields] OR "derives"[All Fields] OR "deriving"[All Fields]))))

### Search details in Web of Science

TOPIC: (sarcopenia OR sarcopenic) AND TOPIC: (vitamin D OR vitamin D3 OR ergocalciferol derivative OR dihydrotachysterol OR 25 hydroxyvitamin D OR colecalfiferol derivative) Timespan: All years. Indexes: SCI-EXPANDED, SSCI, A&HCI, ESCI.

Supplementary Table S1

Risk of bias

| Outcome / Trial                | Bias 1        | Bias 2        | Bias 3        | Bias 4 | Bias 5 | Overall       |
|--------------------------------|---------------|---------------|---------------|--------|--------|---------------|
| Hand grip                      |               |               |               |        |        | High          |
| Björkman                       | Low           | Low           | High          | Low    | Low    | High          |
| Bo                             | Low           | Low           | Low           | Low    | Low    | Low           |
| Cramer                         | Low           | Low           | Some concerns | Low    | Low    | Some concerns |
| FrOST                          | Some concerns | Some concerns | Low           | Low    | Low    | Some concerns |
| PROVIDE                        | Low           | Low           | Some concerns | Low    | Low    | Some concerns |
| Gait speed                     |               |               |               |        |        | Some concerns |
| Cramer                         | Low           | Low           | Some concerns | Low    | Low    | Some concerns |
| FrOST                          | Some concerns | Some concerns | Low           | Low    | Low    | Some concerns |
| PROVIDE                        | Low           | Low           | Some concerns | Low    | Low    | Some concerns |
| Chair-stand                    |               |               |               |        |        | Some concerns |
| Bo                             | Low           | Low           | Low           | Low    | Low    | Low           |
| PROVIDE                        | Low           | Low           | Some concerns | Low    | Low    | Some concerns |
| Relative skeletal muscle index |               |               |               |        |        | Some concerns |
| Bo                             | Low           | Low           | Low           | Low    | Low    | Low           |
| FrOST                          | Some concerns | Some concerns | Low           | Low    | Low    | Some concerns |

Bias 1, randomization process; bias 2, intended interventions; bias 3, missing outcome data; bias 4, measurement of outcomes; bias 5, selection of the reported result

## Supplementary Text 2

### Inconsistency test of changes in hand grip

Q statistic to assess consistency under the assumption of a full design-by-treatment interaction random effects model

|                 | Q    | df | p-value | tau.within | tau2.within |
|-----------------|------|----|---------|------------|-------------|
| Between designs | 2.14 | 1  | 0.1439  | 1.0755     | 1.1567      |

Supplementary Figure S1  
Network plot of gait speed

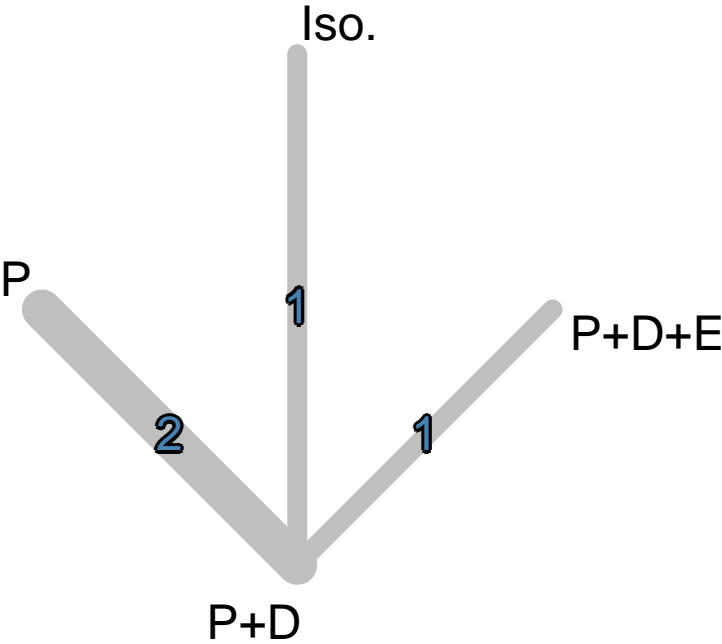

# Supplementary Figure S2

## Network forest plot of muscle mass

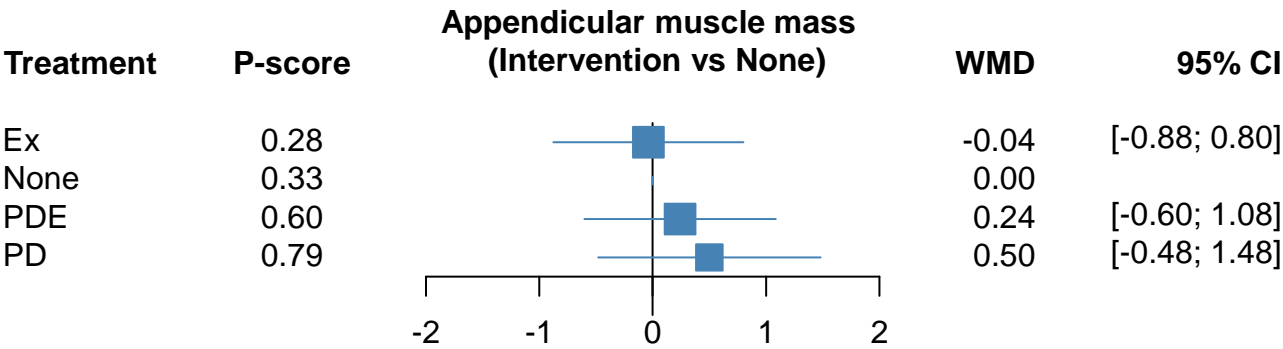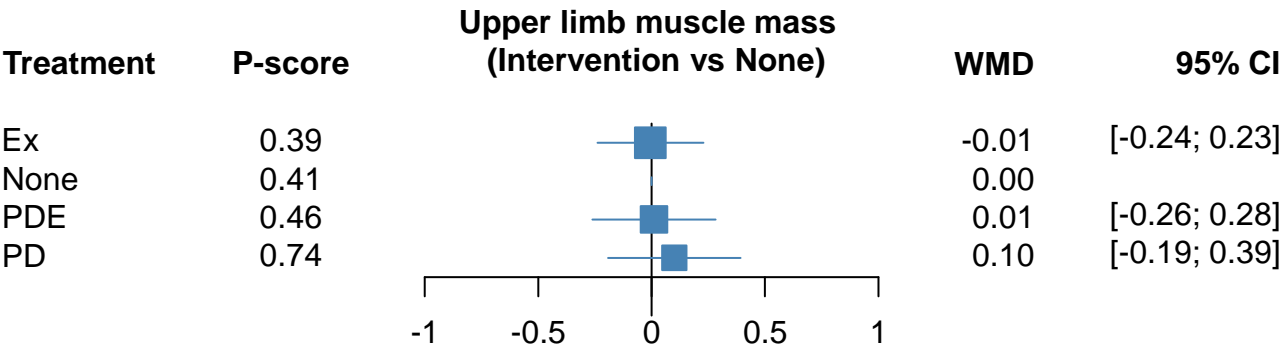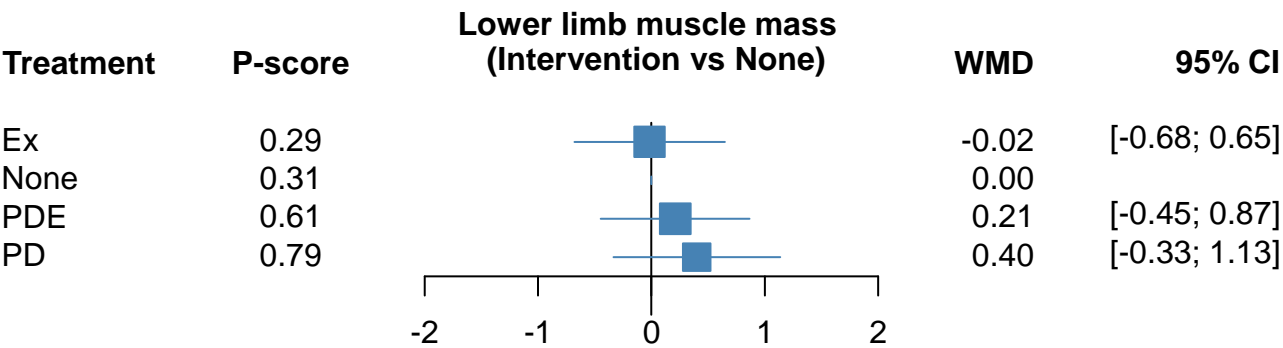



# Supplementary Figure S3

## Funnel plot of relative skeletal muscle index

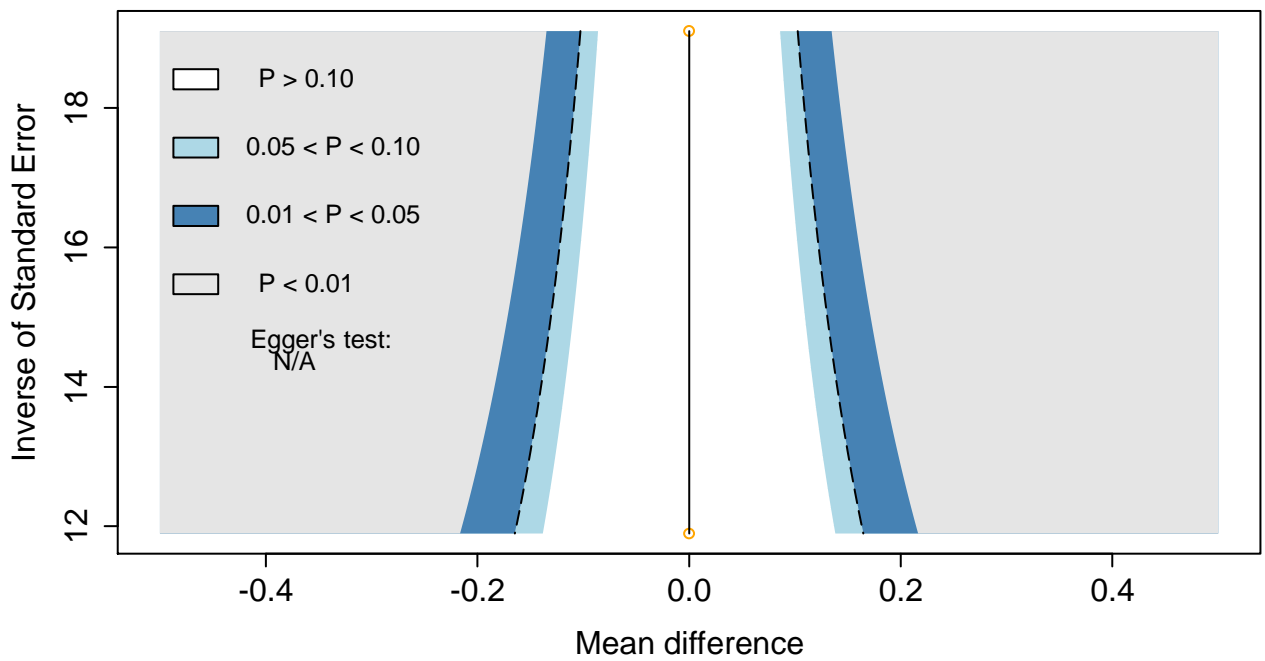

Supplementary Figure S4

Funnel plot of body fat mass

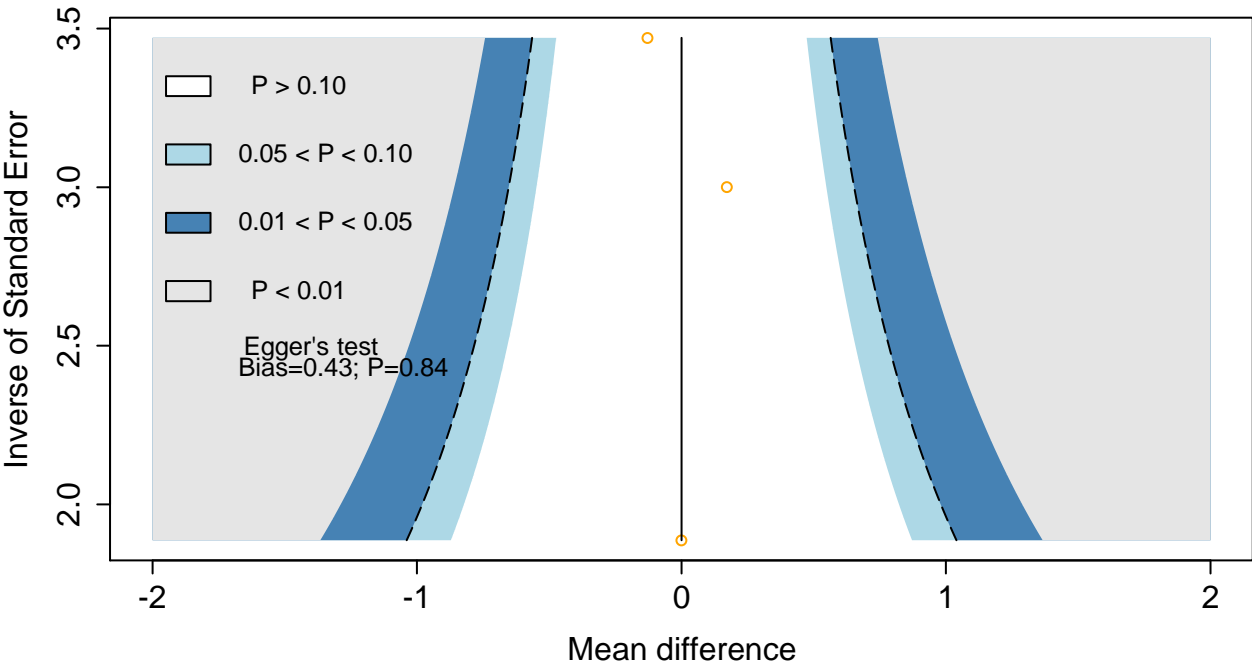

Supplement: s1 [file s1]
